# Supplementary material for: The Preparation of Ginsenoside Rg5, Its Antitumor Activity against Breast Cancer Cells and Its Targeting of PI3K
Source: MDPI journal article supplement (doi:10.3390/nu12010246), 2020-01-18
Supplement: s1 [file s1]

## Supplementary Information for

# The preparation of ginsenoside Rg5, its antitumor activity against breast cancer cells and its targeting of PI3K

Yannan Liu<sup>a,b,c</sup>, Daidi Fan<sup>a,b,c\*</sup>

<sup>a</sup>Shaanxi Key Laboratory of Degradable Biomedical Materials, School of Chemical Engineering, Northwest University, 229 North Taibai Road, Xi'an, Shaanxi 710069, China

<sup>b</sup>Shaanxi R&D Center of Biomaterials and Fermentation Engineering, School of Chemical Engineering, Northwest University, 229 North Taibai Road, Xi'an, Shaanxi 710069, China

<sup>c</sup>Biotech. & Biomed. Reserch Institute, Northwest University, Taibai North Road 229, Xi'an 710069, Shaanxi, China.

Correspondence: Daidi Fan \*E-mail addresses: fandaidi@nwu.edu.cn

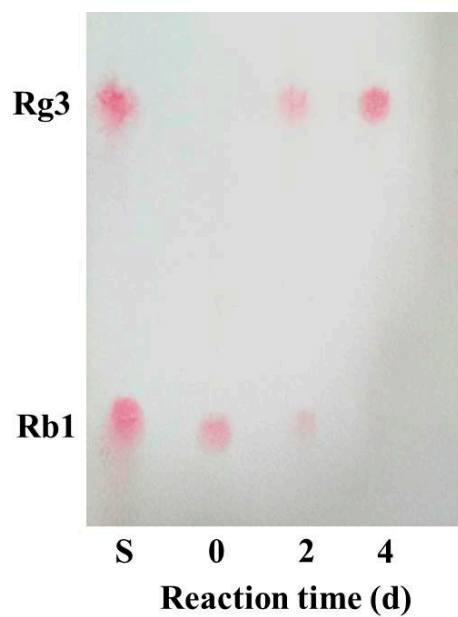

**Supplementary Figure S1.** Thin layer chromatography (TLC) analysis of time-course transformation of ginsenoside Rb1 by  $\beta$ -glucosidase. S is the mixture of ginsenoside standards.

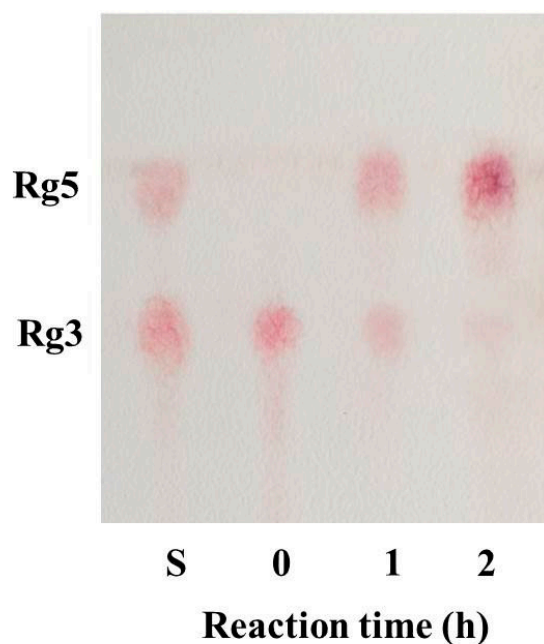

**Supplementary Figure S2.** Thin layer chromatography (TLC) analysis of time-course transformation of ginsenoside Rg3 at 121°C with high pressure processing. S is the mixture of ginsenoside standards.

**Supplementary Table S1.** ADMET property evaluation

| Drug | BBB (%)     | PPB (%) | Chronic toxicity(%) | hERG inhibition | Developmental toxicity | Reproductive toxicity | Hepatotoxicity | AMES toxicity |
|------|-------------|---------|---------------------|-----------------|------------------------|-----------------------|----------------|---------------|
| Rg5  | Non (82.47) | 81.41   | Non (73.67)         | Non (75.01)     | Non (98.28)            | Non (91.86)           | Non (71.45)    | Non (91.65)   |
